# Supplementary material
Source: PubMed Central journal article supplement (PMC7901516)
Supplement: gnaa205_suppl_supplementary_material.pdf [file gnaa205_suppl_supplementary_material.pdf]

## Online Supplementary Material

Supplemental Table 1. Correlations between Covariates, Stress, the Mediators (Avoidant Coping, Approach Coping, and Social Support), and the Psychosocial Outcomes (Depression, Anxiety, and Loneliness)

| Variable                                                     | Stress | Mediator | Psychosocial Outcome |
|--------------------------------------------------------------|--------|----------|----------------------|
| <b>Full Mediation: Stress → Avoidant Coping → Depression</b> |        |          |                      |
| Age                                                          | -.25** | -.17**   | -.20**               |
| Gender                                                       | .11**  | Excl     | Excl                 |
| Health                                                       | .18**  | .07*     | .29**                |
| Annual Household Income                                      | Excl   | Excl     | -.07**               |
| Social Distancing Time                                       | Excl   | Excl     | Excl                 |
| Objective Social Isolation                                   | -.10** | Excl     | .17**                |
| <b>Full Mediation: Stress → Avoidant Coping → Anxiety</b>    |        |          |                      |
| Age                                                          | -.25** | -.17**   | -.22**               |
| Gender                                                       | .11**  | Excl     | Excl                 |
| Health                                                       | .18**  | .07*     | .18**                |
| Annual Household Income                                      | Excl   | Excl     | Excl                 |
| Social Distancing Time                                       | Excl   | Excl     | Excl                 |
| Objective Social Isolation                                   | -.10** | Excl     | .08**                |
| <b>Full Mediation: Stress → Avoidant Coping → Loneliness</b> |        |          |                      |
| Age                                                          | -.25** | -.17**   | -.12**               |
| Gender                                                       | .11**  | Excl     | Excl                 |
| Health                                                       | .18**  | .07*     | .17**                |
| Annual Household Income                                      | Excl   | Excl     | -.19**               |
| Social Distancing Time                                       | Excl   | Excl     | Excl                 |
| Objective Social Isolation                                   | -.10** | Excl     | -.12**               |
| <b>Full Mediation: Stress → Approach Coping → Depression</b> |        |          |                      |
| Age                                                          | -.25** | Excl     | -.25**               |
| Gender                                                       | .11**  | .07*     | Excl                 |
| Health                                                       | .18**  | -.12**   | .27**                |
| Annual Household Income                                      | Excl   | .09**    | -.06*                |
| Social Distancing Time                                       | Excl   | Excl     | Excl                 |
| Objective Social Isolation                                   | -.10** | -.22**   | .11**                |
| <b>Full Mediation: Stress → Approach Coping → Anxiety</b>    |        |          |                      |
| Age                                                          | -.25** | Excl     | -.25**               |
| Gender                                                       | .11**  | .07*     | Excl                 |
| Health                                                       | .17**  | -.13**   | .19**                |
| Annual Household Income                                      | Excl   | .09**    | Excl                 |
| Social Distancing Time                                       | Excl   | Excl     | Excl                 |
| Objective Social Isolation                                   | -.10** | -.22**   | Excl                 |
| <b>Full Mediation: Stress → Approach Coping → Loneliness</b> |        |          |                      |
| Age                                                          | -.25** | Excl     | -.15**               |
| Gender                                                       | .11**  | .07*     | Excl                 |
| Health                                                       | .18**  | -.12**   | .16**                |
| Annual Household Income                                      | Excl   | .09**    | -.18**               |
| Social Distancing Time                                       | Excl   | Excl     | Excl                 |
| Objective Social Isolation                                   | -.10** | -.22**   | .13**                |

| Variable                                                    | Stress | Mediator | Psychosocial Outcome |
|-------------------------------------------------------------|--------|----------|----------------------|
| <b>Full Mediation: Stress → Social Support → Depression</b> |        |          |                      |
| Age                                                         | -.25** | -.08**   | -.29**               |
| Gender                                                      | .11**  | Excl     | Excl                 |
| Health                                                      | .18**  | -.17**   | .25**                |
| Annual Household Income                                     | Excl   | .29**    | Excl                 |
| Social Distancing Time                                      | Excl   | Excl     | Excl                 |
| Objective Social Isolation                                  | -.10** | -.21**   | .10**                |
| <b>Full Mediation: Stress → Social Support → Anxiety</b>    |        |          |                      |
| Age                                                         | -.25** | -.08**   | -.27**               |
| Gender                                                      | .11**  | Excl     | Excl                 |
| Health                                                      | .17**  | -.18**   | .18**                |
| Annual Household Income                                     | Excl   | .29**    | .05*                 |
| Social Distancing Time                                      | Excl   | Excl     | Excl                 |
| Objective Social Isolation                                  | -.10** | -.21**   | Excl                 |
| <b>Full Mediation: Stress → Social Support → Loneliness</b> |        |          |                      |
| Age                                                         | -.25** | -.08**   | -.22**               |
| Gender                                                      | .11**  | Excl     | Excl                 |
| Health                                                      | .17**  | -.18**   | .11**                |
| Annual Household Income                                     | Excl   | .29**    | -.06*                |
| Social Distancing Time                                      | Excl   | Excl     | Excl                 |
| Objective Social Isolation                                  | -.10** | -.21**   | .08**                |

*Note.* \* =  $p < .05$ ; \*\* =  $p < .01$ ; Excl = Excluded from the model as a non-significant correlation.
